# Supplementary material for: Effects of Supplemental Lighting on Flavonoid and Anthocyanin Biosynthesis in Strawberry Flesh Revealed via Metabolome and Transcriptome Co-Analysis
Source: MDPI journal article supplement (doi:10.3390/plants13081070), 2024-04-10
Supplement: s1 [file s1]

| Gene          | TF        | Gene         | TF     |
|---------------|-----------|--------------|--------|
| FvH4_1g21210  | AP2/ERF   | FvH4_3g03530 | LFY    |
| FvH4_4g28030  | AP2/ERF   | FvH4_7g20130 | LOB    |
| FvH4_6g07580  | ARID      | FvH4_4g27090 | MYB    |
| FvH4_6g31930  | AUX/IAA   | FvH4_7g23990 | MYB    |
| FvH4_2g22520  | AUX/IAA   | FvH4_5g06070 | MYB    |
| FvH4_2g38760  | B3-ARF    | FvH4_7g00180 | MYB    |
| FvH4_2g19790  | bHLH      | FvH4_6g43450 | MYB    |
| FvH4_7g24720  | bHLH      | FvH4_1g13110 | MYB    |
| FvH4_4g27100  | bHLH      | FvH4_5g21670 | NAC    |
| FvH4_7g00670  | bHLH      | FvH4_2g16180 | NAC    |
| FvH4_2g36400  | bZIP      | FvH4_4g31070 | NAC    |
| FvH4_4g27390  | C2C2-Dof  | FvH4_7g18010 | NAC    |
| FvH4_3g33660  | C2C2-Dof  | FvH4_1g25150 | NAC    |
| FvH4_3g04730  | C2C2-Dof  | FvH4_6g15670 | NAC    |
| FvH4_3g35790  | C2C2-Dof  | FvH4_7g18000 | NAC    |
| FvH4_5g13390  | C2C2-Dof  | FvH4_2g27430 | NAC    |
| FvH4_c6g00070 | C2H2      | FvH4_6g20510 | NF-YA  |
| FvH4_2g22950  | C2H2      | FvH4_1g08160 | NF-YA  |
| FvH4_2g26420  | CSD       | FvH4_6g34360 | NF-YA  |
| FvH4_2g29840  | DBP       | FvH4_3g29360 | NF-YB  |
| FvH4_1g04080  | GRAS      | FvH4_7g23550 | Others |
| FvH4_2g32670  | GRF       | FvH4_2g19810 | Others |
| FvH4_1g08440  | GRF       | FvH4_1g11530 | Others |
| FvH4_2g39270  | HB-BELL   | FvH4_7g11220 | Others |
| FvH4_5g15520  | HB-HD-ZIP | FvH4_4g31520 | Others |

|              |           |              |          |
|--------------|-----------|--------------|----------|
| FvH4_6g50570 | HB-HD-ZIP | FvH4_2g13840 | Trihelix |
| FvH4_7g17320 | HB-HD-ZIP | FvH4_2g13850 | Trihelix |
| FvH4_7g24360 | HMG       | FvH4_5g39060 | WRKY     |
| FvH4_1g16030 | HSF       | FvH4_3g06200 | WRKY     |
| FvH4_6g17890 | HSF       |              |          |

---

**Table S7** Transcription factors in mature strawberries under different lighting conditions.
