# Supplementary material for: Effects of Supplemental Lighting on Flavonoid and Anthocyanin Biosynthesis in Strawberry Flesh Revealed via Metabolome and Transcriptome Co-Analysis
Source: MDPI journal article supplement (doi:10.3390/plants13081070), 2024-04-10
Supplement: s1 [file s1]

**Table S8** Co-expression network of transcription factors and structural genes with DEM under UV-B light treatment.

| Gene         | Metabolite                                  |
|--------------|---------------------------------------------|
| FvH4_3g40570 | Kaempferol-6,8-di-C-glucoside-7-O-glucoside |
| FvH4_3g40570 | Vitexin-2"-O-galactoside                    |
| FvH4_3g40570 | Kaempferol-3-O-(2"-O-acetyl)glucoside       |
| FvH4_3g40570 | Apigenin-7-O-Gentiobioside                  |
| FvH4_3g40570 | Quercetin-3-O-(6"-O-acetyl)glucoside        |
| FvH4_3g40570 | Kaempferide-3-O-(6"-malonyl)glucoside       |
| FvH4_3g40570 | Liquiritigenin-4'-O-Glucoside (Liquiritin)  |
| FvH4_3g40570 | Isorhamnetin-3-O-(6"-malonyl)glucoside      |
| FvH4_3g40570 | Naringenin-4'-O-glucosid                    |
| FvH4_3g40570 | Luteolin-3'-O-glucoside                     |
| FvH4_3g40570 | Phloretin-4'-O-(6"-p-Coumaroyl)glucoside    |
| FvH4_3g40570 | Kaempferol-3-O-(6"-O-acetyl)glucoside       |
| FvH4_3g40570 | Luteolin-7-O-(6"-malonyl)glucoside          |
| FvH4_3g40570 | Tricin-4'-O-syringic acid                   |
| FvH4_3g40570 | Kaempferol-3-O-(6"-malonyl)galactoside      |
| FvH4_3g40570 | Quercetin-3-O-(6"-O-acetyl)galactoside      |
| FvH4_3g40570 | Vitexin-2"-O-rhamnoside                     |
| FvH4_3g40570 | Naringenin-7-O-(6"-malonyl)glucoside        |
| FvH4_3g40570 | Kaempferol-3-O-(6"-malonyl)glucoside        |
| FvH4_3g40570 | Kaempferol-3,7-O-diglucoside                |
| FvH4_3g40570 | Kaempferol-3-O-rutinoside(Nicotiflorin)     |
| FvH4_3g40570 | C-glucosyl-C-arabinosyl-2-hydroxynaringen   |

|              |                                             |
|--------------|---------------------------------------------|
| FvH4_3g40570 | Kaempferol-7-O-glucoside                    |
| FvH4_3g40570 | Gallocatechin-(4 $\alpha$ →8)-gallocatechin |
| FvH4_3g40570 | Eriodictyol-8-C-glucoside-4'-O-glucosid     |
| FvH4_3g40570 | MethylChrysoeriol-8-C-glucoside             |
| FvH4_3g40570 | Peonidin-3-O-glucoside                      |
| FvH4_3g40570 | Kaempferol-3-O-galactoside (Trifolin        |
| FvH4_4g09340 | Kaempferol-6,8-di-C-glucoside-7-O-glucoside |
| FvH4_4g09340 | Vitexin-2"-O-galactoside                    |
| FvH4_4g09340 | Kaempferol-3-O-(2"-O-acetyl)glucoside       |
| FvH4_4g09340 | Apigenin-7-O-Gentiobioside                  |
| FvH4_4g09340 | Quercetin-3-O-(6"-O-acetyl)glucoside        |
| FvH4_4g09340 | Kaempferide-3-O-(6"-malonyl)glucoside       |
| FvH4_4g09340 | Liquiritigenin-4'-O-Glucoside (Liquiritin)  |
| FvH4_4g09340 | Isorhamnetin-3-O-(6"-malonyl)glucoside      |
| FvH4_4g09340 | Naringenin-4'-O-glucosid                    |
| FvH4_4g09340 | Luteolin-3'-O-glucoside                     |
| FvH4_4g09340 | Phloretin-4'-O-(6"-p-Coumaroyl)glucoside    |
| FvH4_4g09340 | Kaempferol-3-O-(6"-O-acetyl)glucoside       |
| FvH4_4g09340 | Luteolin-7-O-(6"-malonyl)glucoside          |
| FvH4_4g09340 | Tricin-4'-O-syringic acid                   |
| FvH4_4g09340 | Kaempferol-3-O-(6"-malonyl)galactoside      |
| FvH4_4g09340 | Quercetin-3-O-(6"-O-acetyl)galactoside      |
| FvH4_4g09340 | Vitexin-2"-O-rhamnoside                     |
| FvH4_4g09340 | Naringenin-7-O-(6"-malonyl)glucoside        |
| FvH4_4g09340 | Kaempferol-3-O-(6"-malonyl)glucoside        |
| FvH4_4g09340 | Kaempferol-3,7-O-diglucoside                |

|              |                                                             |
|--------------|-------------------------------------------------------------|
| FvH4_4g09340 | Kaempferol-3-O-rutinoside(Nicotiflorin)                     |
| FvH4_4g09340 | C-glucosyl-C-arabinosyl-2-hydroxynaringen                   |
| FvH4_4g09340 | Kaempferol-7-O-glucoside                                    |
| FvH4_4g09340 | Gallocatechin-(4 $\alpha$ →8)-gallocatechin                 |
| FvH4_4g09340 | Eriodictyol-8-C-glucoside-4'-O-glucosid                     |
| FvH4_4g09340 | MethylChrysoeriol-8-C-glucoside                             |
| FvH4_4g09340 | Peonidin-3-O-glucoside                                      |
| FvH4_4g09340 | Kaempferol-3-O-galactoside (Trifolin                        |
| FvH4_1g21210 | Phloretin-4'-O-(6"-p-Coumaroyl)glucoside、                   |
| FvH4_1g21210 | Quercetin-3-O-(2'''-O-p-coumaroyl)sophoroside-7-O-glucoside |
| FvH4_1g21210 | Vitexin-2"-O-galactoside                                    |
| FvH4_1g21210 | Apigenin-7-O-Gentiobioside                                  |
| FvH4_1g21210 | ricin-4'-O-syringic acid                                    |
| FvH4_1g21210 | Eriodictyol-8-C-glucoside-4'-O-glucoside                    |
| FvH4_1g21210 | Vitexin-2"-O-rhamnoside                                     |
| FvH4_1g21210 | C-glucosyl-C-arabinosyl-2-hydroxynaringenin                 |
| FvH4_2g22520 | Phloretin-4'-O-(6"-p-Coumaroyl)glucoside、                   |
| FvH4_2g22520 | Quercetin-3-O-(2'''-O-p-coumaroyl)sophoroside-7-O-glucoside |
| FvH4_2g22520 | Vitexin-2"-O-galactoside                                    |
| FvH4_2g22520 | Apigenin-7-O-Gentiobioside                                  |
| FvH4_2g22520 | ricin-4'-O-syringic acid                                    |
| FvH4_2g22520 | Eriodictyol-8-C-glucoside-4'-O-glucoside                    |
| FvH4_2g22520 | Vitexin-2"-O-rhamnoside                                     |
| FvH4_2g22520 | C-glucosyl-C-arabinosyl-2-hydroxynaringenin                 |
| FvH4_2g22520 | Kaempferol-7-O-glucoside                                    |
| FvH4_2g22520 | Kaempferol-6,8-di-C-glucoside-7-O-glucoside                 |

|              |                                        |
|--------------|----------------------------------------|
| FvH4_2g22520 | Quercetin-3-O-(6"-O-acetyl)galactoside |
| FvH4_2g22520 | Naringenin-7-O-(6"-malonyl)glucoside   |
| FvH4_2g22520 | Luteolin-7-O-(6"-malonyl)glucoside     |
| FvH4_2g22520 | Kaempferol-3-O-(6"-malonyl)galactoside |

---
