# Supplementary material for: Effects of Supplemental Lighting on Flavonoid and Anthocyanin Biosynthesis in Strawberry Flesh Revealed via Metabolome and Transcriptome Co-Analysis
Source: MDPI journal article supplement (doi:10.3390/plants13081070), 2024-04-10
Supplement: s1 [file s1]

**Table S6** Differential expression of flavonoid biosynthetic and regulatory genes in the strawberry fruits under RB and UVB irradiation.

| Gene ID      | CK-FR-1 | CK-FR-2 | CK-FR-3 | RB71-FR-1 | RB71-FR-2 | RB71-FR-3 | UV-B-FR-1 | UV-B-FR-2 | UV-B-FR-3 | Types  |
|--------------|---------|---------|---------|-----------|-----------|-----------|-----------|-----------|-----------|--------|
| FvH4_6g16060 | 159.63  | 126.80  | 125.22  | 205.98    | 162.89    | 184.26    | 137.00    | 164.64    | 149.43    | PAL    |
| FvH4_7g19130 | 292.49  | 244.70  | 234.62  | 262.97    | 250.30    | 250.60    | 244.16    | 261.60    | 365.14    |        |
| FvH4_3g40570 | 29.00   | 17.85   | 26.12   | 77.05     | 31.35     | 101.65    | 68.39     | 31.43     | 76.82     | C4H    |
| FvH4_3g30980 | 11.90   | 9.26    | 12.50   | 16.62     | 11.47     | 13.87     | 14.07     | 11.52     | 13.43     |        |
| FvH4_6g16460 | 550.72  | 596.32  | 559.70  | 417.88    | 546.72    | 366.18    | 408.03    | 552.12    | 609.05    | 4CL    |
| FvH4_4g09340 | 15.55   | 17.76   | 18.17   | 47.70     | 29.16     | 31.26     | 33.82     | 19.39     | 29.25     |        |
| FvH4_5g07750 | 6.87    | 8.64    | 7.01    | 13.86     | 6.39      | 9.72      | 12.61     | 5.20      | 6.56      |        |
| FvH4_6g27940 | 0.86    | 1.10    | 0.63    | 4.08      | 3.68      | 0.44      | 2.43      | 0.19      | 5.52      |        |
| FvH4_2g37640 | 3.49    | 3.26    | 2.85    | 12.64     | 3.50      | 10.17     | 12.88     | 3.36      | 4.00      |        |
| FvH4_7g33990 | 13.09   | 9.43    | 13.38   | 19.93     | 13.82     | 16.58     | 14.97     | 16.42     | 10.23     | CHS    |
| FvH4_7g01160 | 948.68  | 1023.81 | 898.07  | 1133.45   | 1159.30   | 1544.96   | 976.64    | 1179.74   | 1028.29   |        |
| FvH4_7g20870 | 81.06   | 101.01  | 77.69   | 107.06    | 120.96    | 139.80    | 85.77     | 135.68    | 74.37     | CHI    |
| FvH4_7g25890 | 1051.37 | 842.57  | 947.73  | 1168.04   | 1096.88   | 1110.48   | 938.26    | 1083.11   | 1074.34   |        |
| FvH4_1g11810 | 782.50  | 610.96  | 599.47  | 700.34    | 671.26    | 854.19    | 592.19    | 800.56    | 711.74    | F3H    |
| FvH4_3g02980 | 6.25    | 7.94    | 4.71    | 17.83     | 11.13     | 5.02      | 5.12      | 6.04      | 4.75      |        |
| FvH4_2g39520 | 353.98  | 417.38  | 280.65  | 538.50    | 516.73    | 485.52    | 384.00    | 484.04    | 408.22    | DFR    |
| FvH4_2g39530 | 543.99  | 432.82  | 504.63  | 959.55    | 608.33    | 818.65    | 612.31    | 686.16    | 484.34    |        |
| FvH4_5g20430 | 18.85   | 29.33   | 31.04   | 9.53      | 16.01     | 3.88      | 6.54      | 15.92     | 11.83     | FLS    |
| FvH4_7g24550 | 30.31   | 14.76   | 23.55   | 22.02     | 13.39     | 19.19     | 39.74     | 24.13     | 21.69     |        |
| FvH4_5g38050 | 12.38   | 24.87   | 29.24   | 59.57     | 16.28     | 13.01     | 35.51     | 17.98     | 10.86     | ANS    |
| FvH4_1g02120 | 644.10  | 463.92  | 536.36  | 228.51    | 467.41    | 297.88    | 264.40    | 488.08    | 527.91    |        |
| FvH4_5g01170 | 1009.61 | 923.43  | 786.79  | 1171.34   | 1052.43   | 1069.33   | 971.43    | 1111.53   | 1208.21   | F3'H   |
| FvH4_6g34910 | 2.59    | 2.54    | 3.23    | 3.58      | 3.43      | 4.68      | 3.73      | 3.04      | 3.87      |        |
| FvH4_6g34950 | 5.54    | 6.02    | 5.43    | 11.09     | 4.38      | 3.97      | 12.41     | 2.58      | 4.96      | F3'5'H |
| FvH4_5g10440 | 8.60    | 6.92    | 8.17    | 9.88      | 9.23      | 10.62     | 9.74      | 9.95      | 8.37      |        |
| FvH4_1g12660 | 56.31   | 39.32   | 33.91   | 33.68     | 33.01     | 21.58     | 36.79     | 39.64     | 55.68     | OMT    |
| FvH4_1g19400 | 12.60   | 11.22   | 8.89    | 7.22      | 9.17      | 4.71      | 7.04      | 8.47      | 13.74     |        |
| FvH4_1g19390 | 34.15   | 16.48   | 16.70   | 9.20      | 16.22     | 10.95     | 17.28     | 24.04     | 29.13     |        |
| FvH4_5g13300 | 2.96    | 4.09    | 3.81    | 10.95     | 4.61      | 8.07      | 9.09      | 4.49      | 3.97      |        |
| FvH4_6g50530 | 21.86   | 19.77   | 30.37   | 20.08     | 20.98     | 16.67     | 13.07     | 20.53     | 15.81     | UFGT   |
| FvH4_3g10810 | 8.28    | 18.91   | 8.87    | 8.55      | 6.16      | 12.36     | 9.47      | 8.14      | 10.79     |        |
| FvH4_4g11780 | 18.63   | 32.98   | 17.87   | 9.58      | 9.76      | 8.81      | 10.24     | 6.61      | 19.73     |        |
| FvH4_7g16110 | 21.17   | 14.70   | 12.02   | 67.81     | 19.58     | 43.74     | 55.64     | 12.74     | 29.45     |        |
| FvH4_6g39410 | 35.78   | 70.17   | 48.88   | 38.43     | 30.52     | 56.38     | 30.81     | 37.48     | 45.53     |        |
| FvH4_6g39380 | 13.28   | 14.21   | 15.85   | 28.17     | 16.00     | 14.09     | 13.52     | 8.23      | 34.98     |        |
| FvH4_1g13990 | 25.68   | 24.25   | 31.81   | 60.47     | 41.18     | 54.43     | 46.52     | 37.49     | 26.68     |        |
| FvH4_5g23800 | 5.29    | 5.66    | 6.37    | 11.59     | 7.16      | 5.91      | 9.07      | 5.51      | 7.75      |        |
