# Supplementary material for: Effects of Supplemental Lighting on Flavonoid and Anthocyanin Biosynthesis in Strawberry Flesh Revealed via Metabolome and Transcriptome Co-Analysis
Source: MDPI journal article supplement (doi:10.3390/plants13081070), 2024-04-10
Supplement: s1 [file s1]

**Table 3** Transcriptome sequencing results of mature strawberries under different light conditions.

| Sample | Total reads | Total mapped | Total CDS | Intron  | Express gene | Q30    |
|--------|-------------|--------------|-----------|---------|--------------|--------|
| WT1    | 22759754    | 80.55%       | 49878025  | 1067422 | 19493        | 95.62% |
| WT2    | 26826631    | 80.56%       | 59114737  | 1285115 | 19824        | 96.18% |
| WT3    | 24427773    | 80.28%       | 53081069  | 1153718 | 19734        | 96.17% |
| RB1    | 20759983    | 79.23%       | 44480903  | 1079652 | 20539        | 95.05% |
| RB2    | 23104510    | 77.72%       | 48899025  | 981864  | 19954        | 91.82% |
| RB3    | 32915788    | 78.19%       | 69771822  | 1543474 | 20040        | 94.05% |
| UVB1   | 21232950    | 79.04%       | 45500990  | 965316  | 20051        | 94.44% |
| UVB2   | 30400897    | 79.11%       | 65504670  | 1393565 | 19853        | 94.24% |
| UVB3   | 22409493    | 78.76%       | 48260158  | 1037198 | 19823        | 93.89% |
